# Supplementary material for: Optimization of Purification, Identification and Evaluation of the in Vitro Antitumor Activity of Polyphenols from Pinus Koraiensis Pinecones
Source: PubMed Central journal article supplement (PMC6272533; doi:10.3390/molecules200610450), 2015-06-05
Supplement: molecules-20-10450-s001.pdf [file molecules-20-10450-s001.pdf]

# Supplementary Material

**Table S1.** Independent variables their levels used for BBD.

| Variables                          | Level |     |     |
|------------------------------------|-------|-----|-----|
|                                    | -1    | 0   | 1   |
| Sample concentration $X_1$ (mg/mL) | 1.0   | 1.5 | 2.0 |
| Sample volume $X_2$ (mL)           | 10    | 20  | 30  |
| Ethanol concentration $X_3$ (%)    | 50    | 60  | 70  |

**Table S2.** Regression coefficients of the predicted quadratic polynomial model.

| Source        | SS <sup>a</sup> | DF <sup>b</sup> | MS <sup>c</sup> | F-Value | Prob-Value |
|---------------|-----------------|-----------------|-----------------|---------|------------|
| $X_1$         | 63.96           | 1               | 63.96           | 276.26  | <0.0001    |
| $X_2$         | 44.46           | 1               | 44.46           | 192.05  | <0.0001    |
| $X_3$         | 26.50           | 1               | 26.50           | 114.46  | 0.0001     |
| $X_1$ - $X_2$ | 6.35            | 1               | 6.35            | 27.43   | 0.0034     |
| $X_1$ - $X_3$ | 4.08            | 1               | 4.08            | 17.62   | 0.0085     |
| $X_2$ - $X_3$ | 2.53            | 1               | 2.53            | 10.92   | 0.0241     |
| $X_1^2$       | 71.46           | 1               | 71.46           | 308.65  | <0.0001    |
| $X_2^2$       | 88.08           | 1               | 88.08           | 380.45  | <0.0001    |
| $X_3^2$       | 44.05           | 1               | 44.05           | 190.29  | <0.0001    |

<sup>a</sup>: Sums of squares; <sup>b</sup>: Sums of squares; <sup>c</sup>: Mean square.

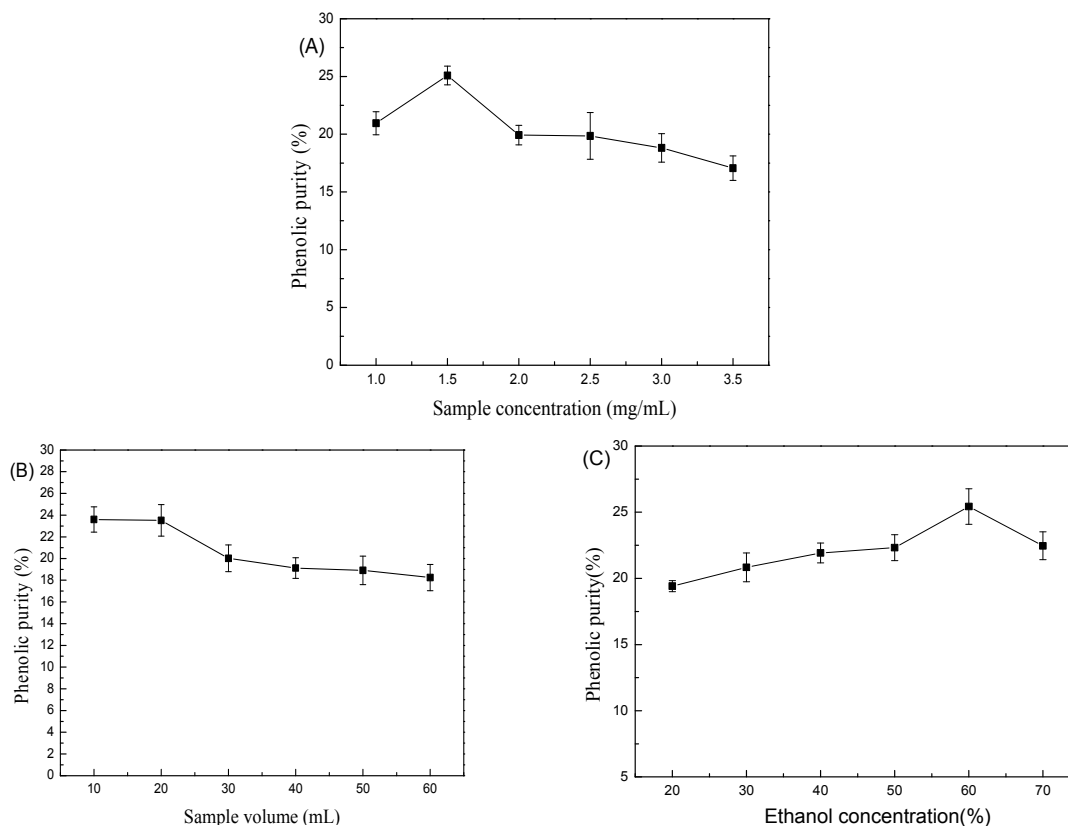

**Figure S1.** Effects of different purification parameters on purity of PPP (sample concentration, mg/mL; sample volume, mL; ethanol concentration, %).
